# Supplementary material for: Biosynthesis, Antimicrobial and Cytotoxic Effect of Silver Nanoparticles Using a NovelNocardiopsissp. MBRC-1
Source: Hindawi journal article supplement (doi:10.1155/2013/287638), 2013-01-01
Supplement: f1 [file 287638.f1.pdf]

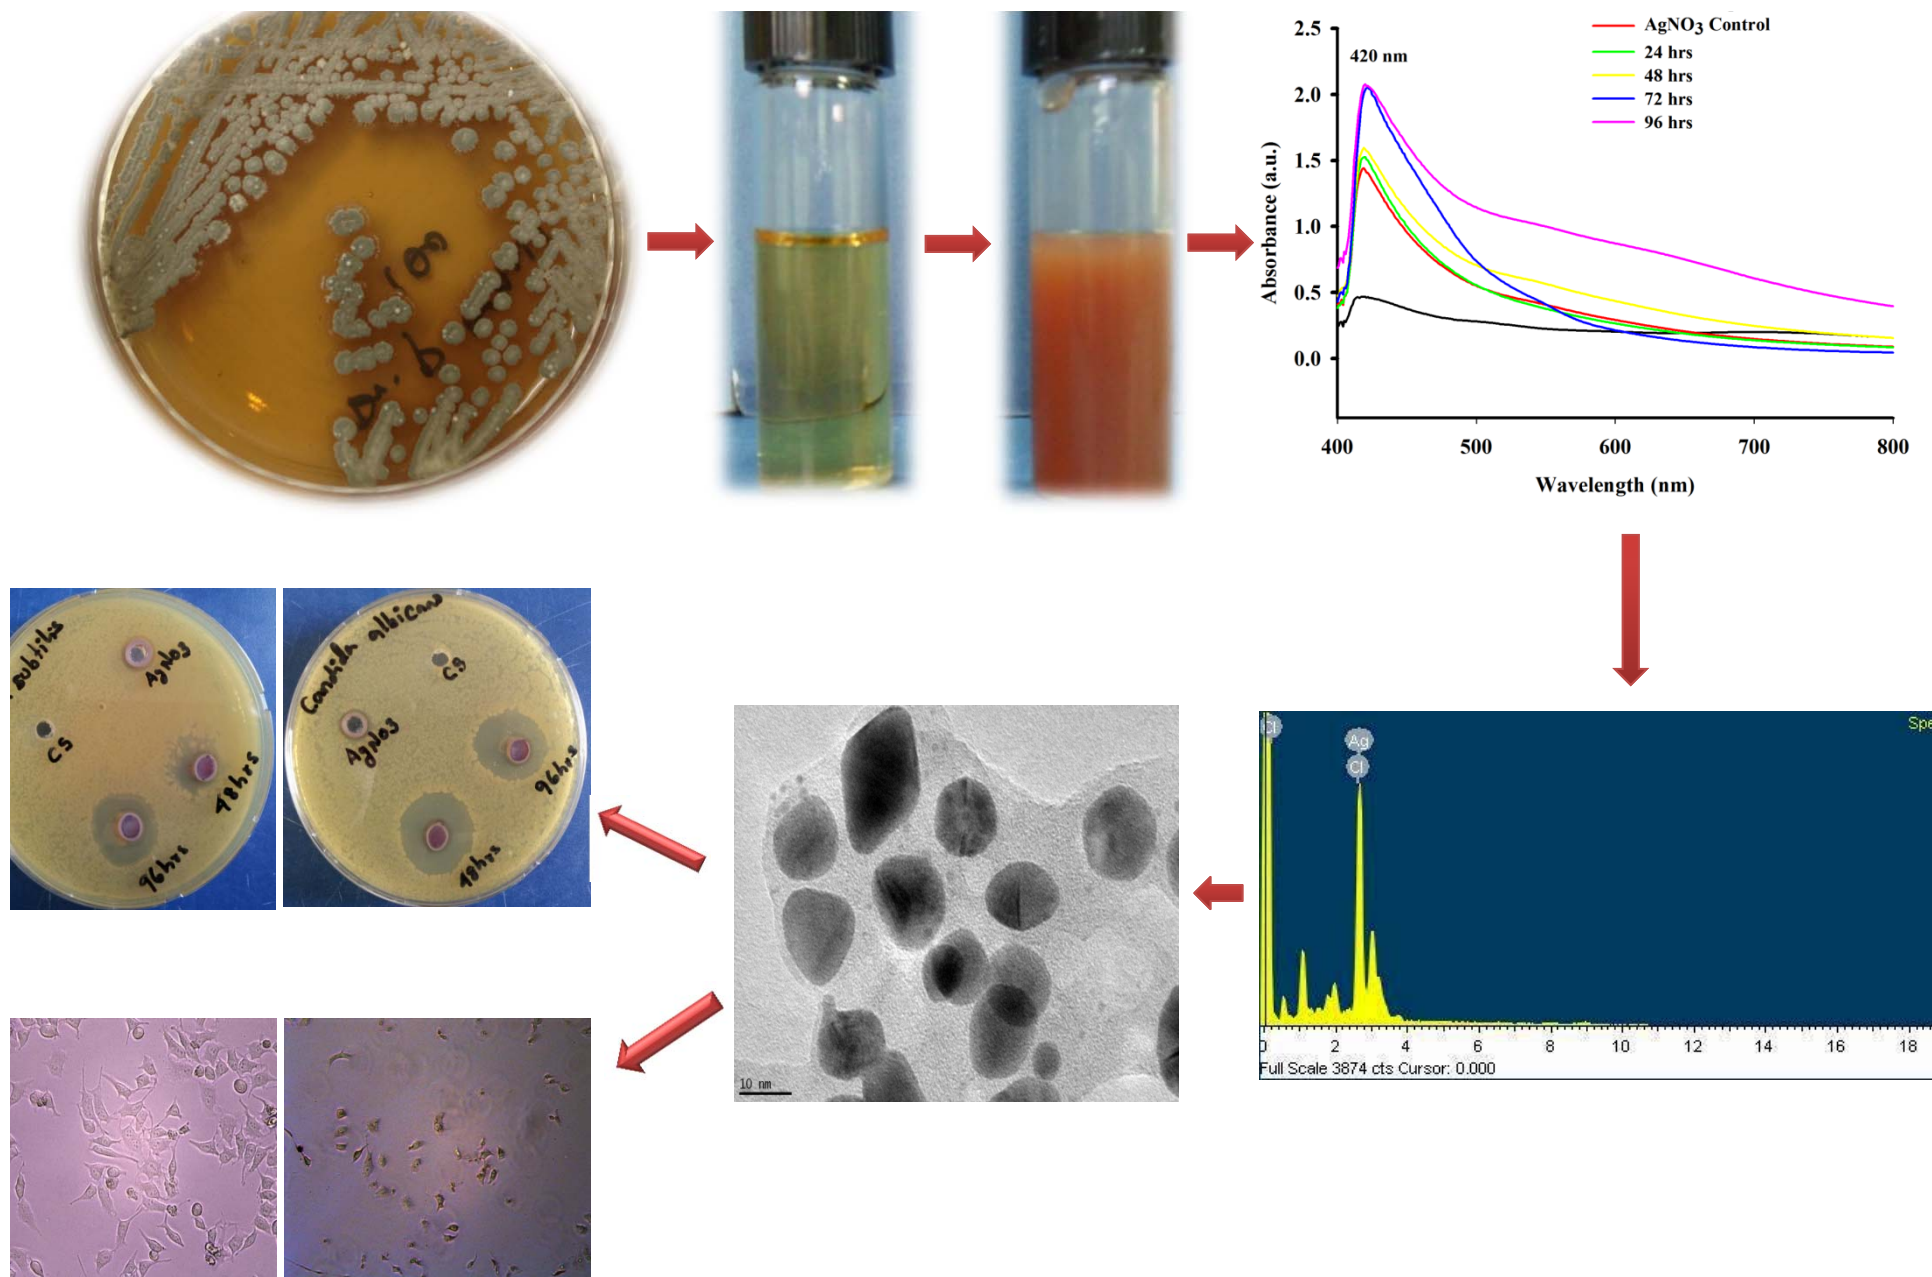

**Supplemental Figure 1. Biosynthesis, characterization and biomedical applications of silver**
